# Supplementary material for: Highly lubricative, self-healing, chemically degradable, anti-flaming and anti-irradiating magnetic gels simply prepared from binary mixtures of Fe3O4 nanoparticles and water
Source: Royal Society of Chemistry journal article supplement (doi:10.1039/d3ta08026a), 2024-01-01
Supplement: d3ta08026a1.pdf [file d3ta08026a1.pdf]

## Electronic Supplementary Information for

# Highly Lubricative, Self-Healing, Chemically Degradable, Anti-Flaming and Anti-Irradiating Magnetic Gels Simply from Binary Mixtures of Fe<sub>3</sub>O<sub>4</sub> Nanoparticles and Water

Lulin Hu,<sup>†, ‡</sup> Weiyan Yu,<sup>†, ‡</sup> Jian Liu,<sup>†</sup> Yi Yang,<sup>†, ‡, \*</sup> Jingcheng Hao<sup>‡, §</sup> and Lu Xu<sup>†, ‡, \*</sup>

<sup>†</sup>State Key Laboratory of Solid Lubrication, Lanzhou Institute of Chemical Physics, Chinese Academy of Sciences, Lanzhou 730000, People's Republic of China;

<sup>‡</sup>Shandong Laboratory of Advanced Materials and Green Manufacturing at Yantai, Yantai 264000, People's Republic of China;

<sup>§</sup>Key Laboratory of Colloid and Interface Chemistry & Key Laboratory of Special Aggregated Materials, Shandong University, Jinan 250100, People's Republic of China.

Corresponding authors: [yangyi@licp.cas.cn](mailto:yangyi@licp.cas.cn); [xulu@licp.cas.cn](mailto:xulu@licp.cas.cn)

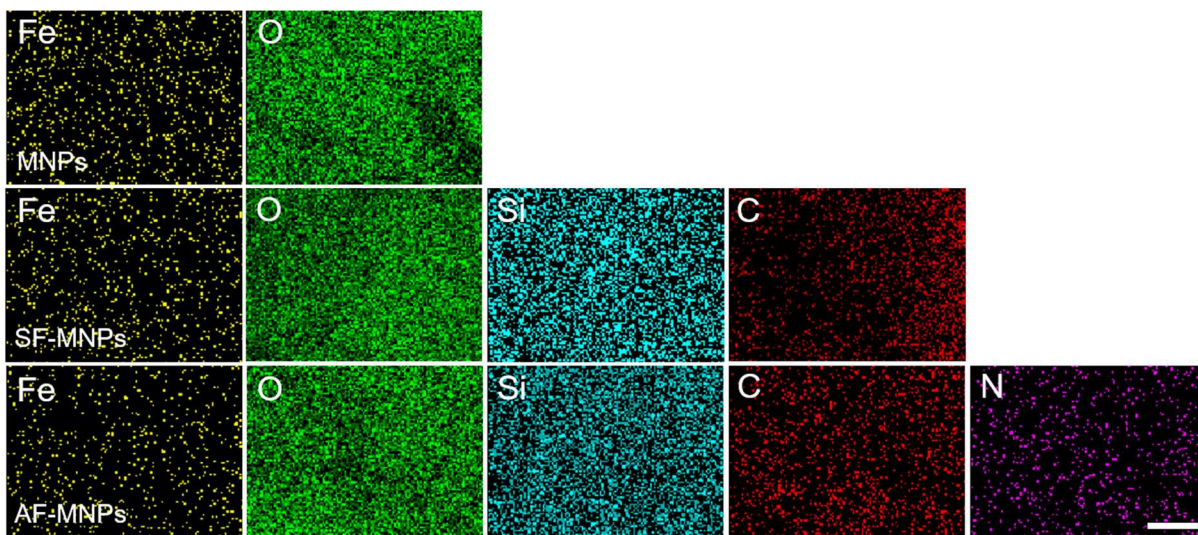

**Figure S1.** Element distribution on the surface of pristine, SF-, and AF-MNPs. Scale bar = 1  $\mu\text{m}$ .

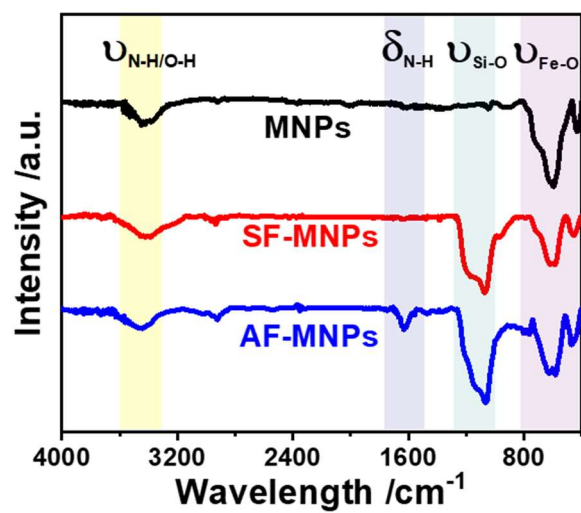

**Figure S2.** FT-IR spectra of pristine, SF- and AF-MNPs. T = 25 °C.

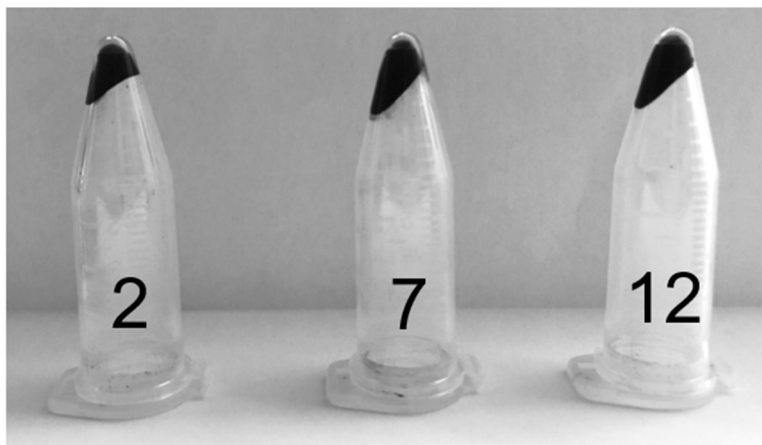

**Figure S3.** Photographs of the inorganic Fe<sub>3</sub>O<sub>4</sub> gels. The numbers refer to the internal pH values of the aqueous gels. T = 25 °C.

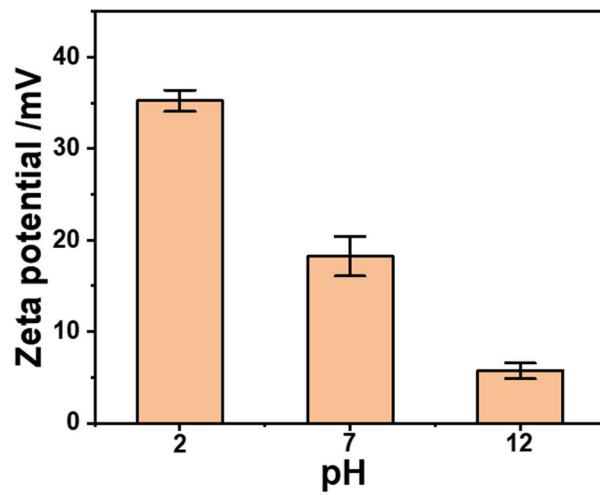

**Figure S4.** Zeta potential measurements of  $1 \text{ mg mL}^{-1}$  aqueous suspensions of AF-MNPs at different pH values.  $T = 25 \text{ }^\circ\text{C}$ .  $c_{\text{Fe}_3\text{O}_4} = 48 \text{ wt\%}$ .

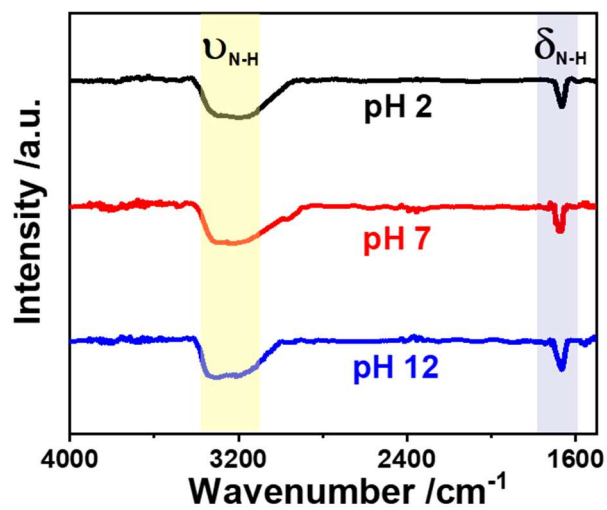

**Figure S5.** FT-IR spectra of lyophilized Fe<sub>3</sub>O<sub>4</sub> gels at pH 2, 7 and 12, respectively. T = 25 °C.

$c_{\text{Fe}_3\text{O}_4} = 48 \text{ wt\%}$ .

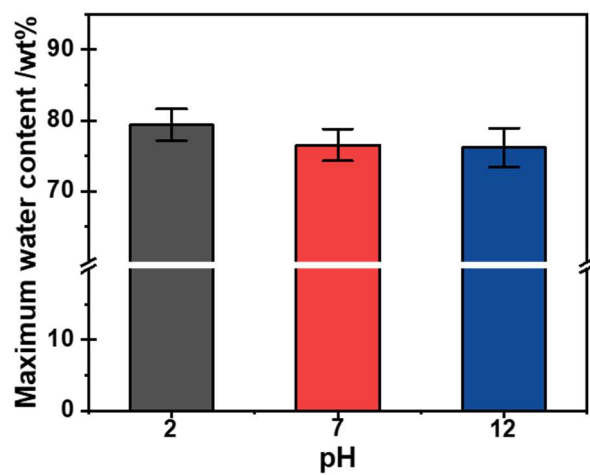

**Figure S6.** Maximum water content (in wt%) of the magnetic gels with different internal pH values. T = 25 °C.

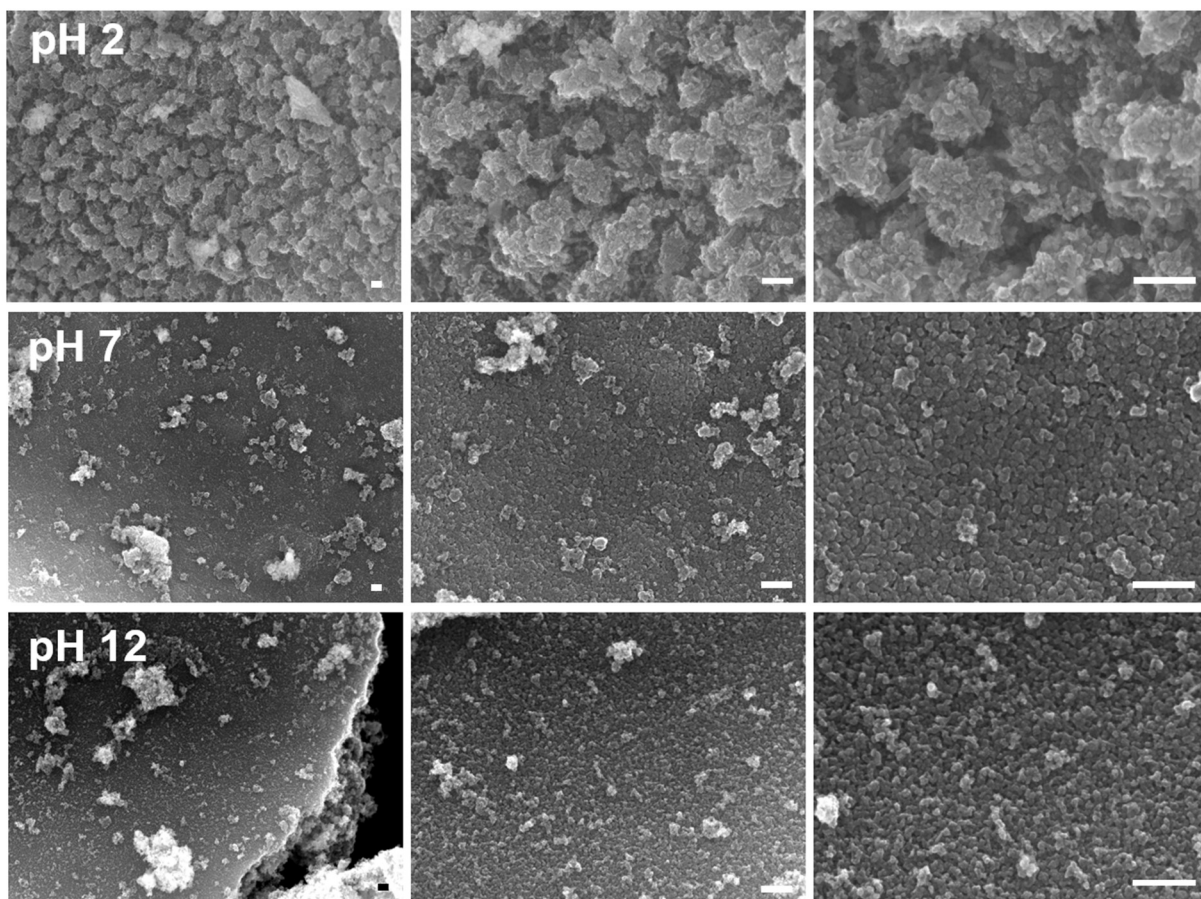

**Figure S7.** SEM images of freeze-dried Fe<sub>3</sub>O<sub>4</sub> gels obtained at different scanning locations and magnifications. Scale bar = 100 nm.  $c_{\text{Fe}_3\text{O}_4} = 48 \text{ wt\%}$ .



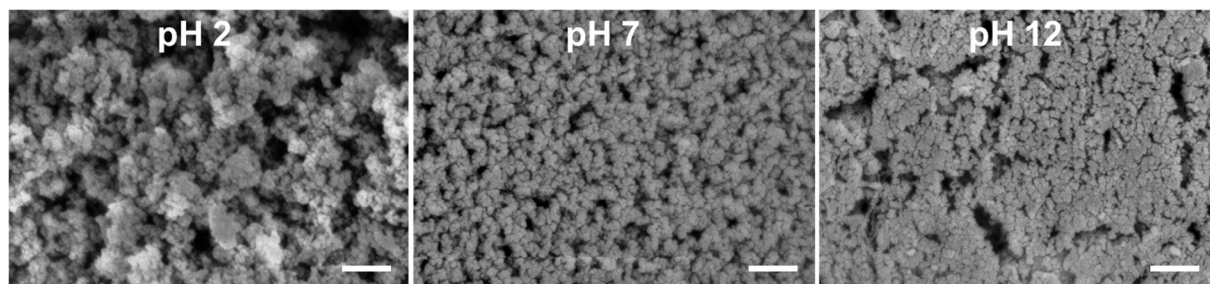

**Figure S8.** Cryogenic scanning electron microscopy (cryo-SEM) observations of the  $\text{Fe}_3\text{O}_4$  gels at pH 2, 7 and 12, respectively. Scale bar = 100 nm.  $c_{\text{Fe}_3\text{O}_4} = 48$  wt%.

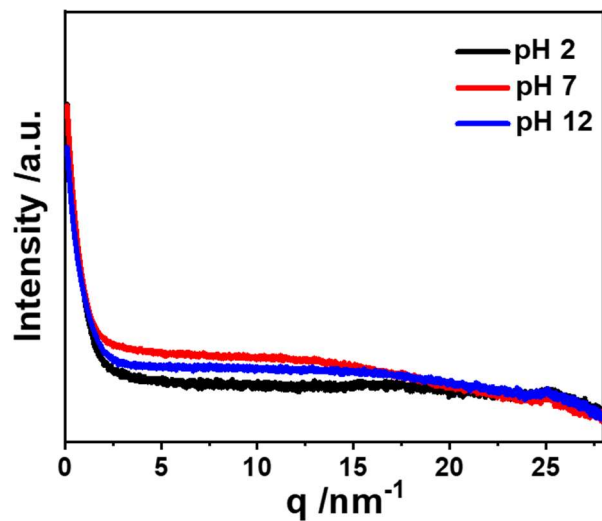

**Figure S9.** SAXS patterns of lyophilized Fe<sub>3</sub>O<sub>4</sub> gels at different pH values. T = 25 °C.  $c_{\text{Fe}_3\text{O}_4} = 48$  wt%.

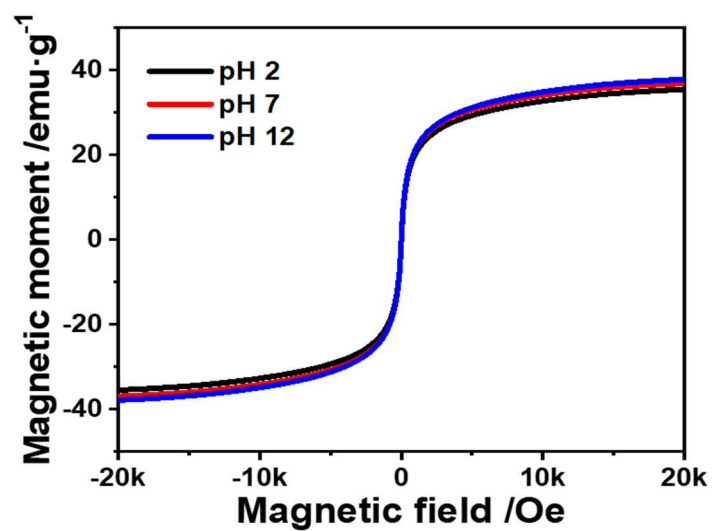

**Figure S10.** SQUID magnetometry profiles of 48 wt% Fe<sub>3</sub>O<sub>4</sub> gels with different internal pH values at 25 °C.

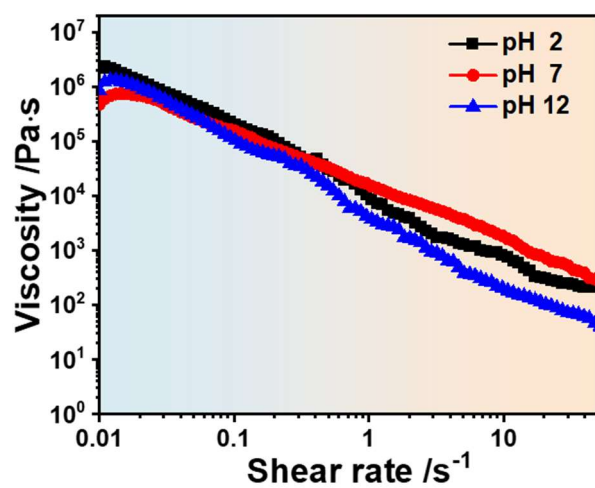

**Figure S11.** Colloidal viscosity of the Fe<sub>3</sub>O<sub>4</sub> gels at shear rates between 0.01 and 50 s<sup>-1</sup>. T = 25 °C.  $c_{\text{Fe}_3\text{O}_4} = 48$  wt%.

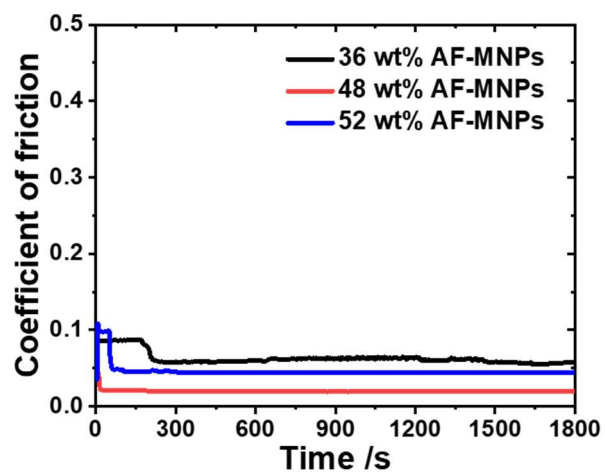

**Figure S12.** Effect of particle concentration on the CoF of pH 12  $\text{Fe}_3\text{O}_4$  gels at 800 N and 20 Hz.  $T = 25\text{ }^\circ\text{C}$ .

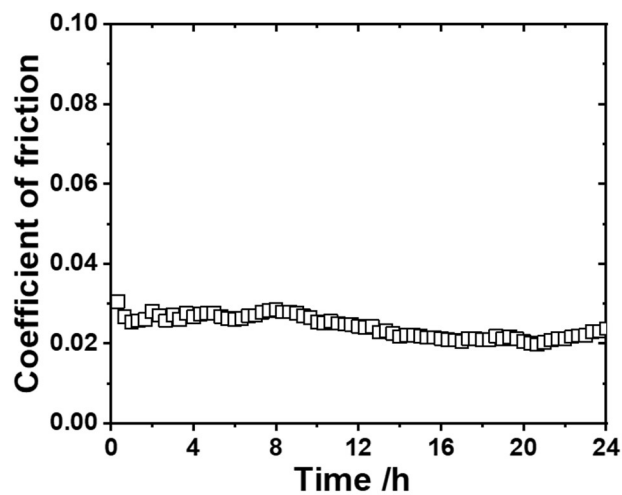

**Figure S13.** CoF of the pH 12  $\text{Fe}_3\text{O}_4$  gel upon continuously used for 24 h under 800 N and 20 Hz.  $T = 25\text{ }^\circ\text{C}$ .  $c_{\text{Fe}_3\text{O}_4} = 48\text{ wt}\%$ .

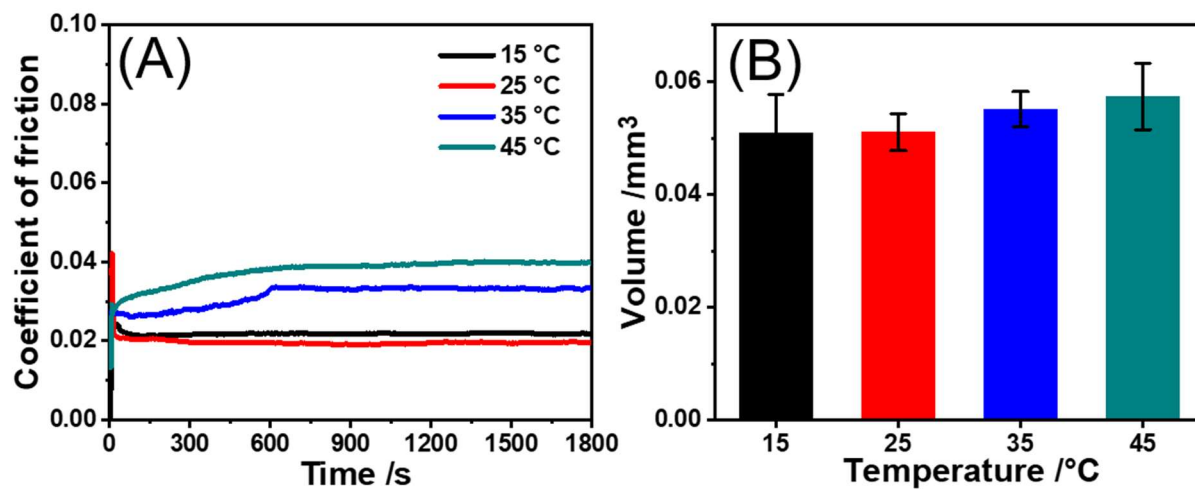

**Figure S14.** (A) CoF and (B) wear volume of the pH 12  $\text{Fe}_3\text{O}_4$  gel at temperatures between 15 and 45 °C under 800 N and 20 Hz.  $c_{\text{Fe}_3\text{O}_4} = 48$  wt%.

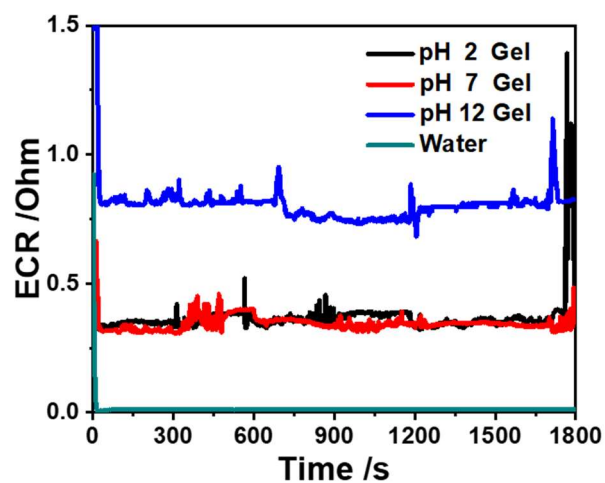

**Figure S15.** ECR of water and  $\text{Fe}_3\text{O}_4$  gels with different internal pH values at 25 °C.  $c_{\text{Fe}_3\text{O}_4} = 48 \text{ wt\%}$ .



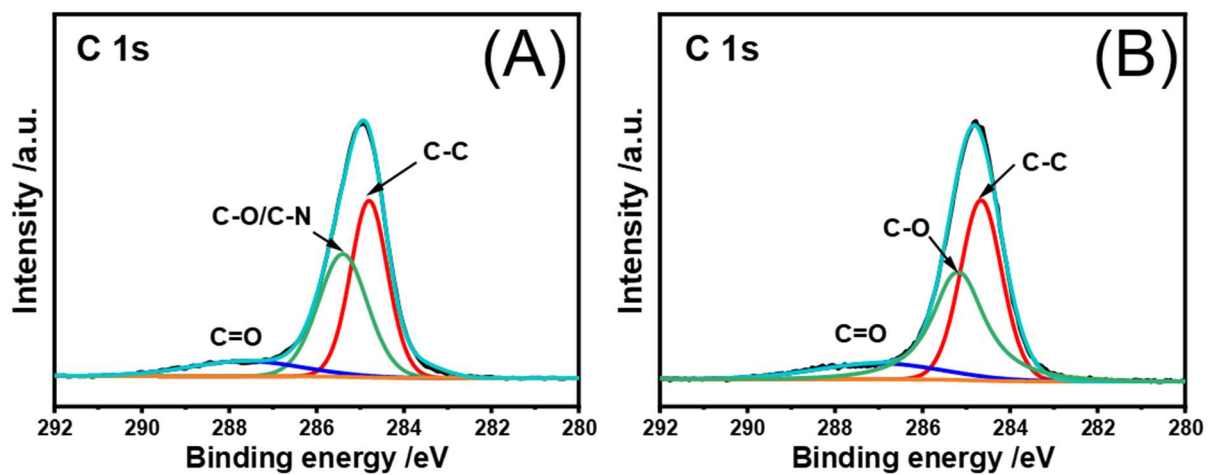

**Figure S16.** XPS C 1s spectra of steel substrates lubricated with (A) pH 12  $\text{Fe}_3\text{O}_4$  gel and (B) ultrapure water, respectively.  $T = 25\text{ }^\circ\text{C}$ .

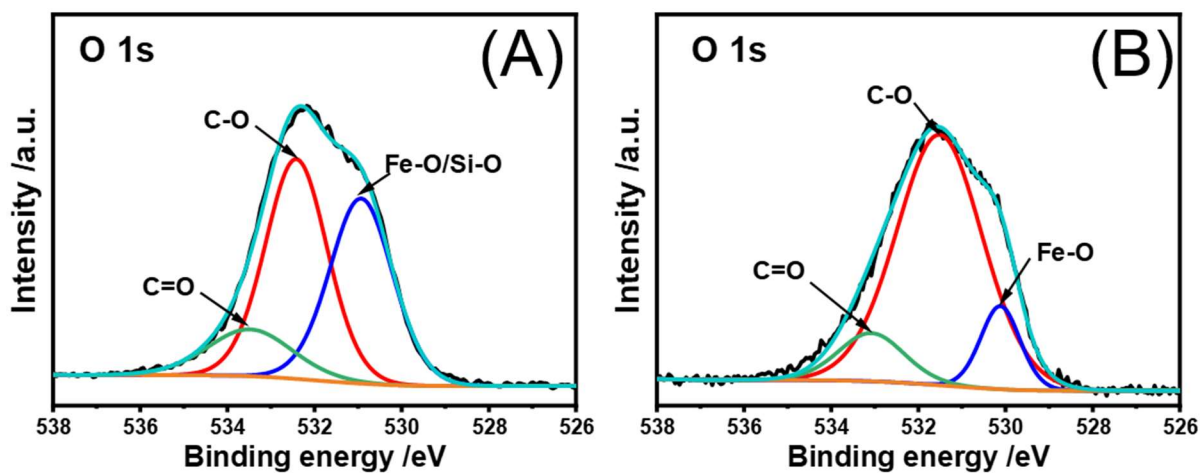

**Figure S17.** XPS O 1s spectra of steel substrates lubricated with (A) pH 12  $\text{Fe}_3\text{O}_4$  gel and (B) deionized water, respectively.  $T = 25^\circ\text{C}$ .

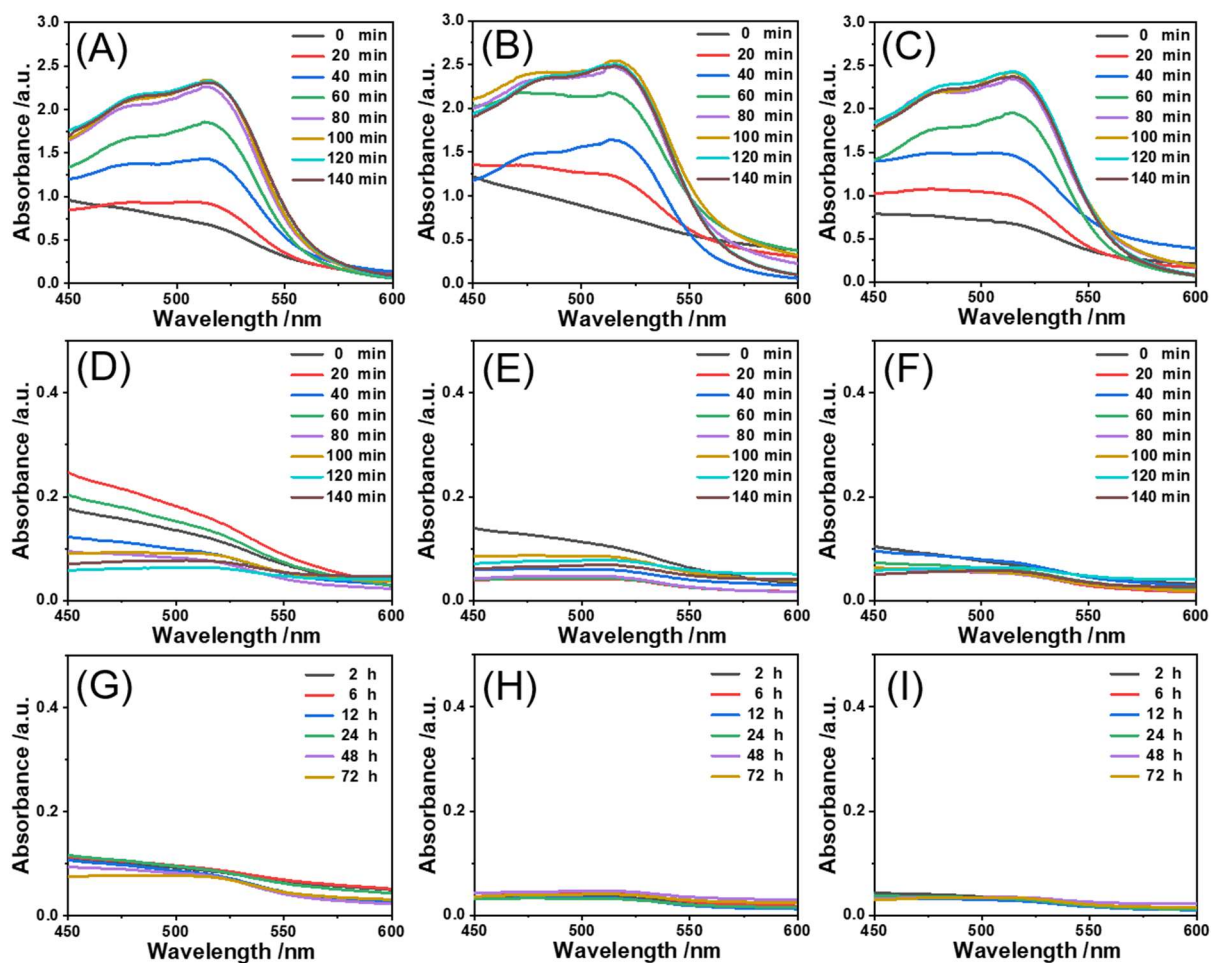

**Figure S18.** UV-vis spectra of the pH 2 (A), 7 (B) and 12 (C)  $\text{Fe}_3\text{O}_4$  gels after immersed in hydrochloric acid for 140 min. UV-vis spectra of the pH 2 (D, G), 7 (E, H) and 12 (F, I)  $\text{Fe}_3\text{O}_4$  gels after placed in deionized water for different durations.  $T = 25\text{ }^\circ\text{C}$ .

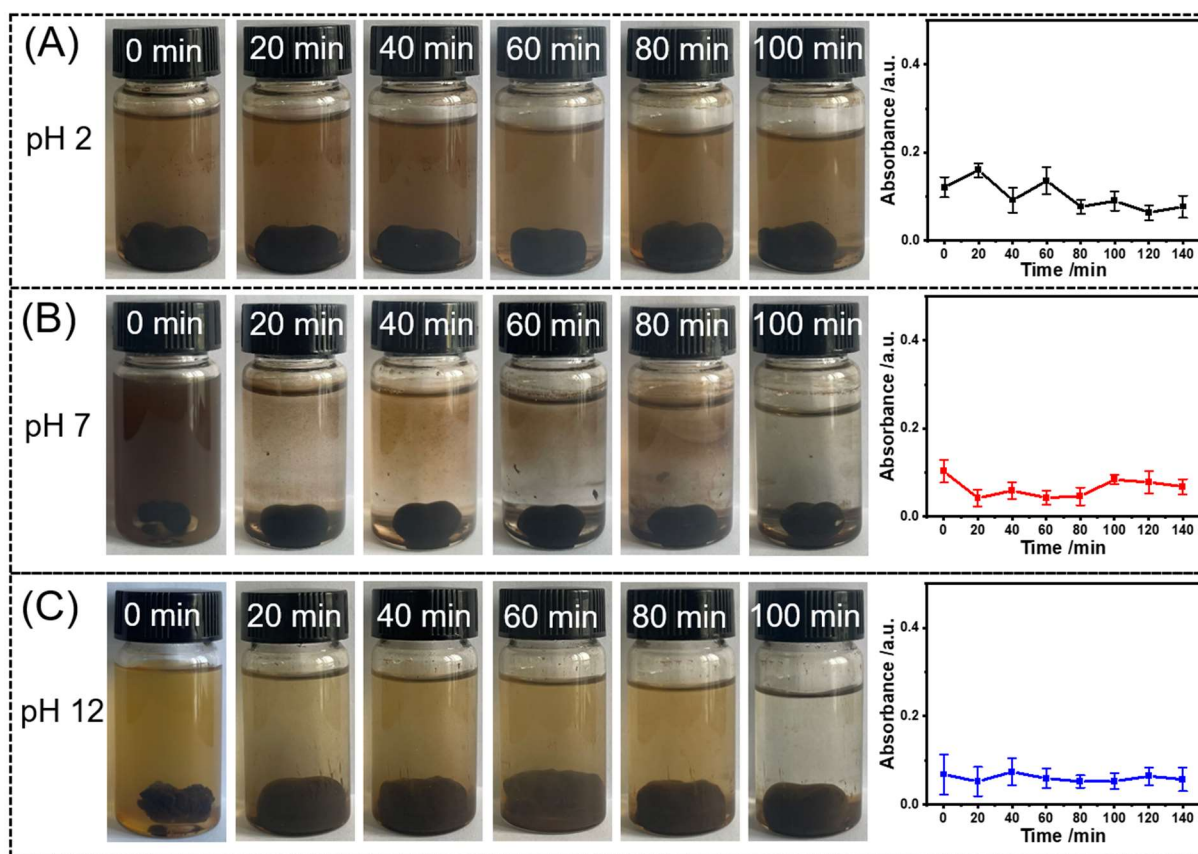

**Figure S19.** Variation of the pH 2 (A), 7 (B) and 12 (C) magnetic gels after placed in ultrapure water for 100 min under magnetic stirring. The UV-vis spectra on the right were used for monitoring the decomposition process by detecting the absorbance of released Fe-based ions in solutions.

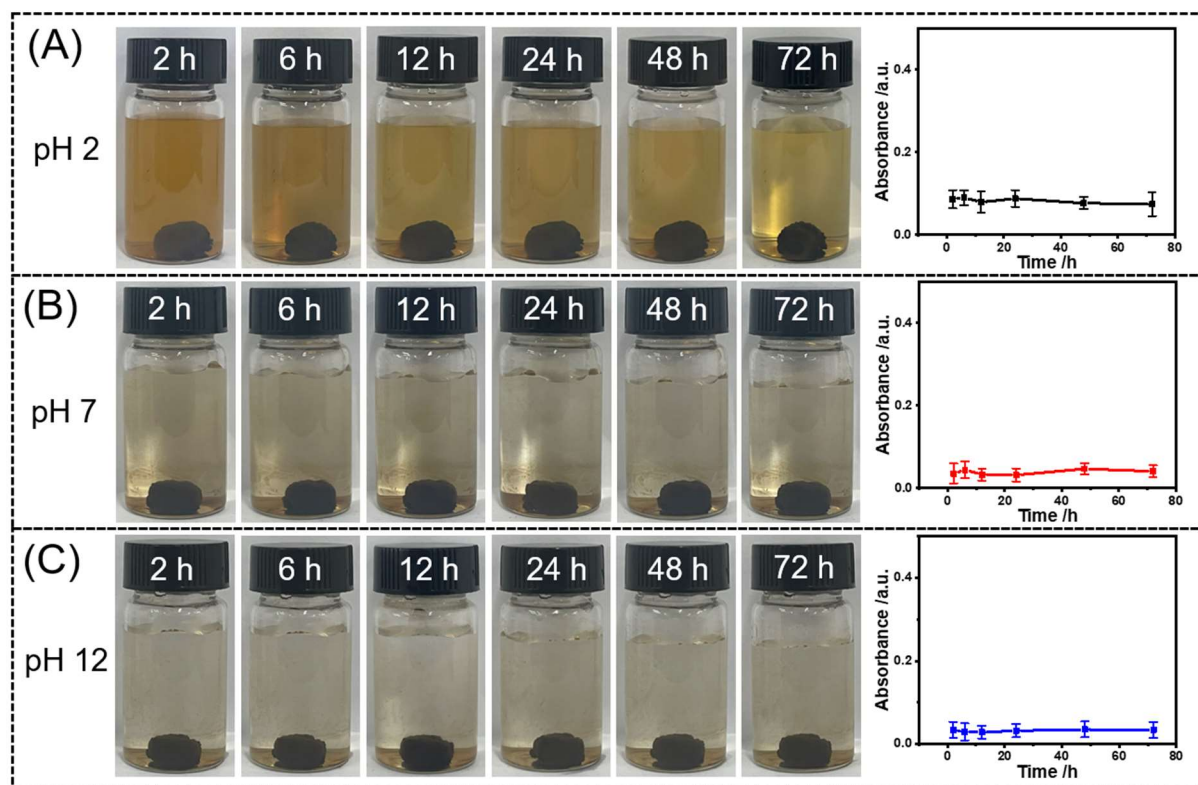

**Figure S20.** Variation of the pH 2 (A), 7 (B) and 12 (C) magnetic gels after placed in ultrapure water for continuous 72 h without magnetic stirring. The UV-vis spectra on the right were used for monitoring the decomposition process by detecting the absorbance of released Fe-based ions in solutions.

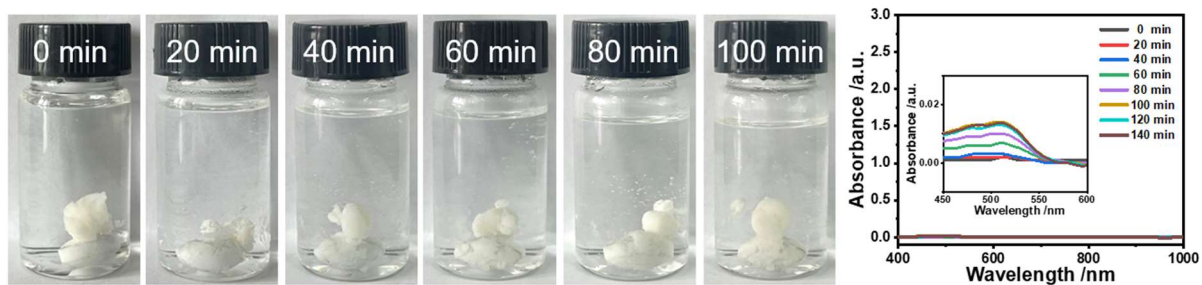

**Figure S21.** Variation of an equal amount of commercially available magnetic greases after placed in 1 mol L<sup>-1</sup> HCl solutions for 100 min under magnetic stirring. The UV-vis spectra on the right were utilized to monitor the degradation process by detecting the absorbance of released Fe-based ions in solutions.

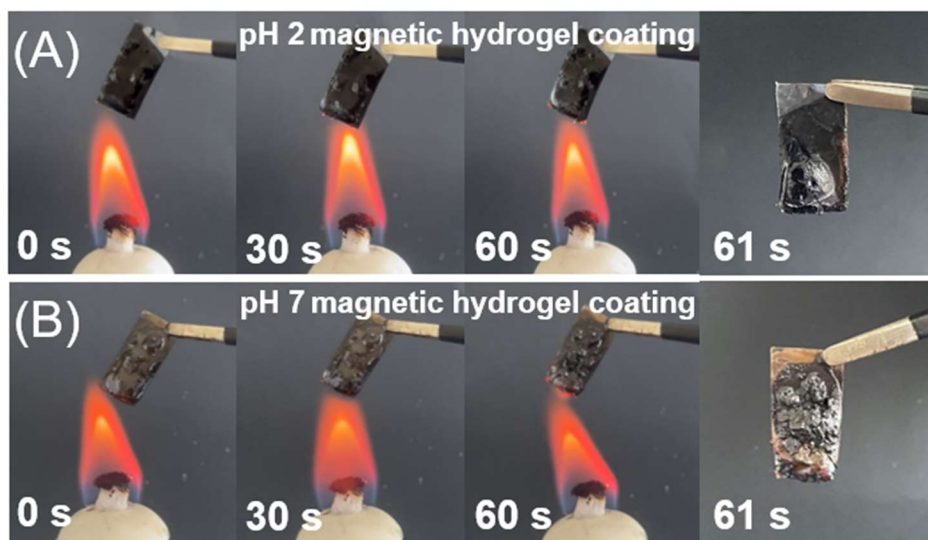

**Figure S22.** Photographs of plastic substrates coated with pH 2 (A) and 7 (B)  $\text{Fe}_3\text{O}_4$  gels upon exposure to an external alcohol lamp.

**Movie S1.** Magnetically controlled migration of a pH 12, 48 wt% Fe<sub>3</sub>O<sub>4</sub> gel by an external 0.25 T magnet at 25 °C.
